# Supplementary material for: 3D-Cultured Adipose-Derived Stem Cell Spheres Using Calcium-Alginate Scaffolds for Osteoarthritis Treatment in a Mono-Iodoacetate-Induced Rat Model
Source: MDPI journal article supplement (doi:10.3390/ijms24087062), 2023-04-11
Supplement: s1 [file s1]

## Supplementary Materials

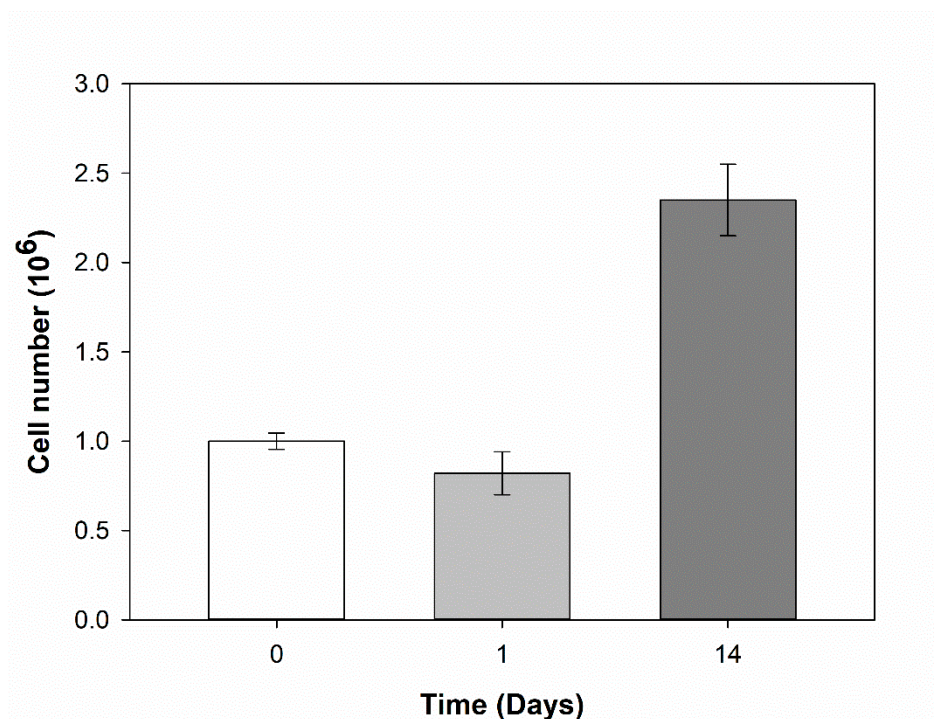

**Figure S1.** Cell proliferation of hADSCs in Ca-Ag scaffold was analyzed at 0, 1 and 14 days by the CellTiter-Glo® luminescent cell viability assay.

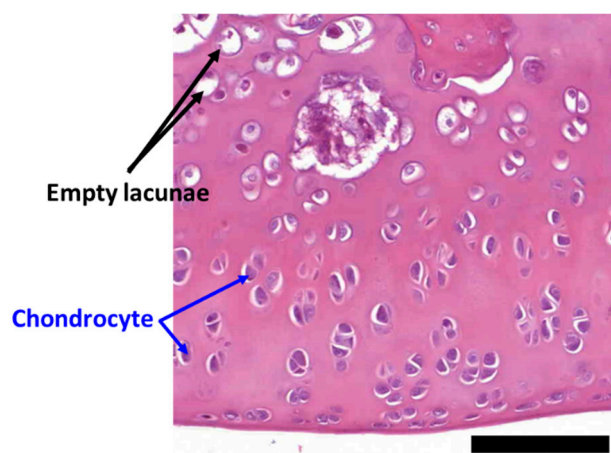

**Figure S2.** Articular cartilage of the rat knee with H & E staining. The empty lacunae and chondrocyte were indicated by black arrow and blue arrow, respectively (scale bar = 50  $\mu\text{m}$ ).
